# Supplementary material
Source: PubMed Central journal article supplement (PMC384757)

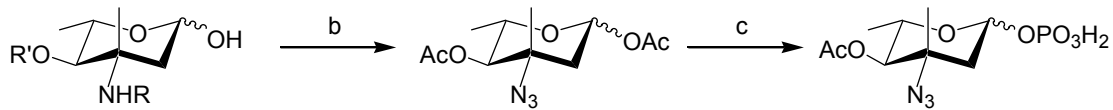

a

- **7**  $R = Cbz, R' = Ac$
- **8**  $R = R' = H$

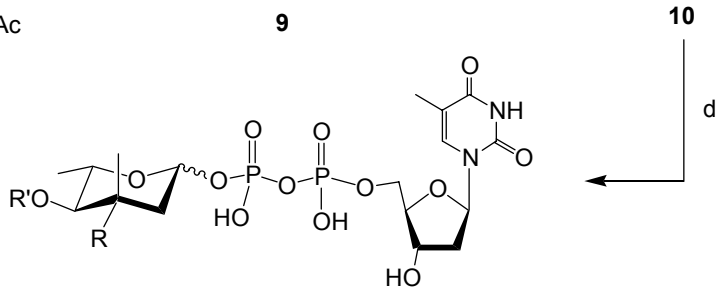

e

- **11**  $R = N_3, R' = Ac$
- **12**  $R = NH_2, R' = H$

Supplement: pnas_101_13_4390__2.pdf [file pnas_101_13_4390__2.pdf]
